# Supplementary material for: Defect-induced room temperature ferromagnetism in Cu-doped In2S3QDs
Source: Royal Society of Chemistry journal article supplement (doi:10.1039/d0cp03389h), 2020-01-01
Supplement: d0cp03389h1.pdf [file d0cp03389h1.pdf]

Supplementary Information

Defect-induced room temperature ferromagnetism in Cu-doped  $\text{In}_2\text{S}_3$

QDs

*Yi Liu, Peidong Xiao, Liyong Du, Xiao Liang and Mingzhe Zhang\**

State Key Laboratory of Superhard Materials, College of Physics, Jilin University,  
Changchun 130012, People's Republic of China.

\*E-mail address: zhangmz@jlu.edu.cn

Table S1 Summary of some structural parameters of 2-theta, lattice parameter (a), FWHM, average crystallite size, dislocation density and micro strain for Cu-doped  $\text{In}_2\text{S}_3$  QDs with different doping concentrations.

| Sample                           | $(2\theta)_{22\ 12}$ | c(nm) | FWHM $_{(22\ 12)}$ | D(nm) $_{22\ 12}$ | $\delta (\times 10^{-3})$ | $\epsilon (\times 10^{-3})$ |
|----------------------------------|----------------------|-------|--------------------|-------------------|---------------------------|-----------------------------|
| pristine $\text{In}_2\text{S}_3$ | 48.20                | 3.202 | 3.21               | 2.68              | 373                       | 31.31                       |
| 0.5% Cu                          | 48.22                | 3.201 | 3.15               | 2.73              | 366                       | 30.71                       |
| 1.5% Cu                          | 48.25                | 3.199 | 3.04               | 2.83              | 353                       | 29.62                       |
| 2% Cu                            | 48.27                | 3.198 | 3.09               | 2.79              | 358                       | 30.09                       |

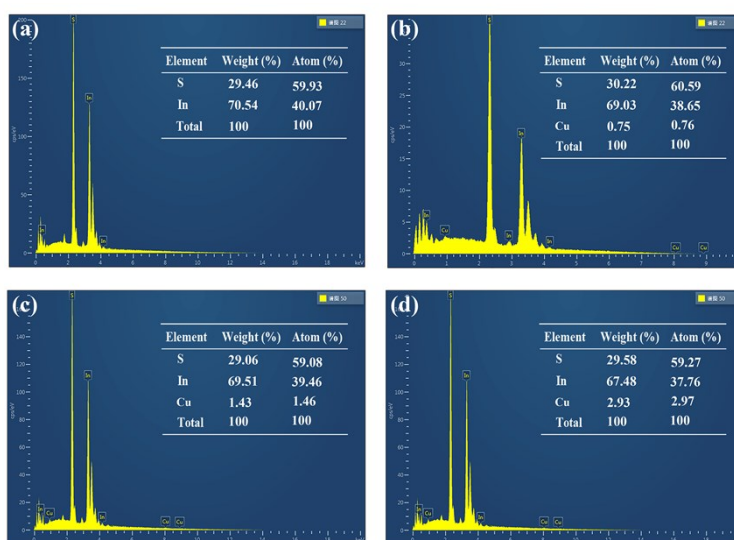

Fig. S1 EDX patterns of pristine  $\text{In}_2\text{S}_3$  (a) and Cu-doped  $\text{In}_2\text{S}_3$  QDs with dopant concentration of 0.5% (b), 1.5% (c), 2% (d).

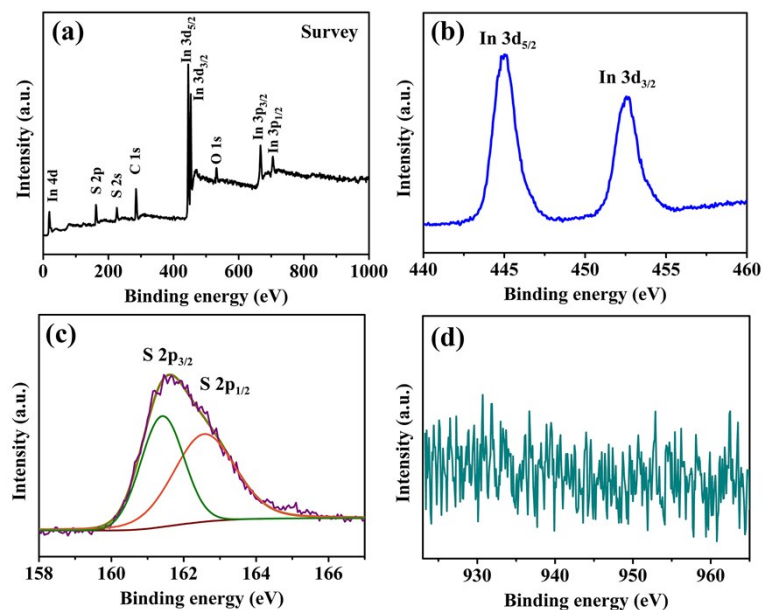

Fig. S2 (a) XPS survey spectrum and high resolution XPS spectra of the pristine  $\text{In}_2\text{S}_3$  QDs corresponding to (b) In 3d, (c) S 2p, (d) Cu 2p regions.

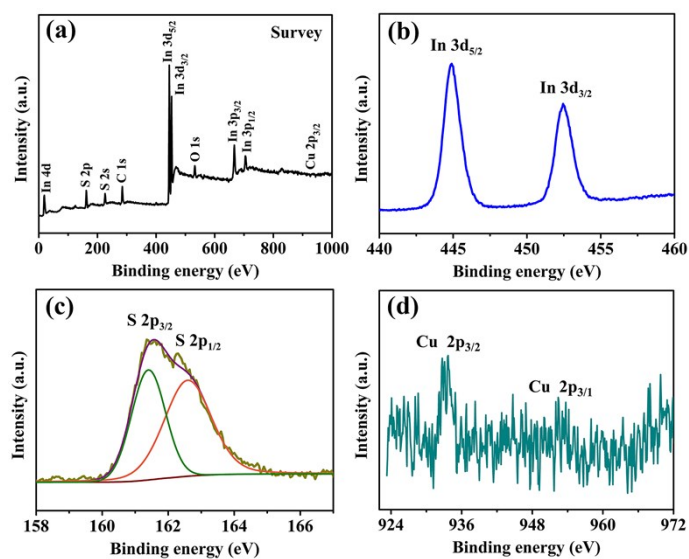

Fig. S3 (a) XPS survey spectrum and high resolution XPS spectra of Cu (0.5 %) doped  $\text{In}_2\text{S}_3$  QDs corresponding to (b) In 3d, (c) S 2p, (d) Cu 2p regions.

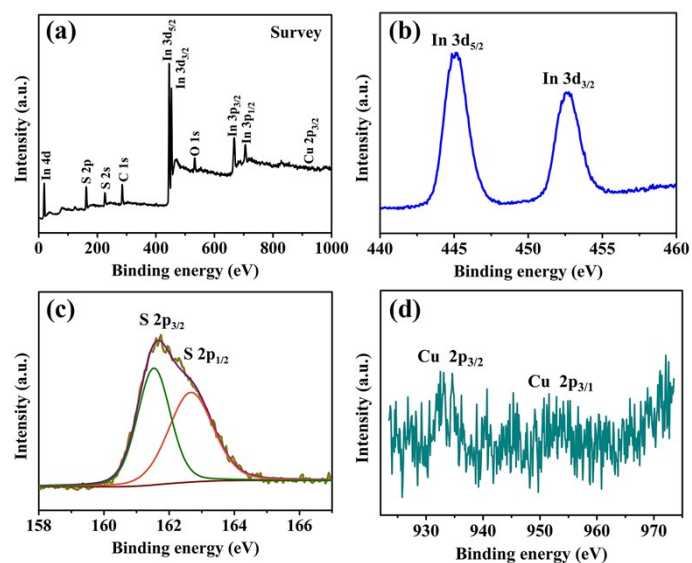

Fig. S4 (a) XPS survey spectrum and high resolution XPS spectra of Cu (1.5 %) doped  $\text{In}_2\text{S}_3$  QDs corresponding to (b) In 3d, (c) S 2p, (d) Cu 2p regions.

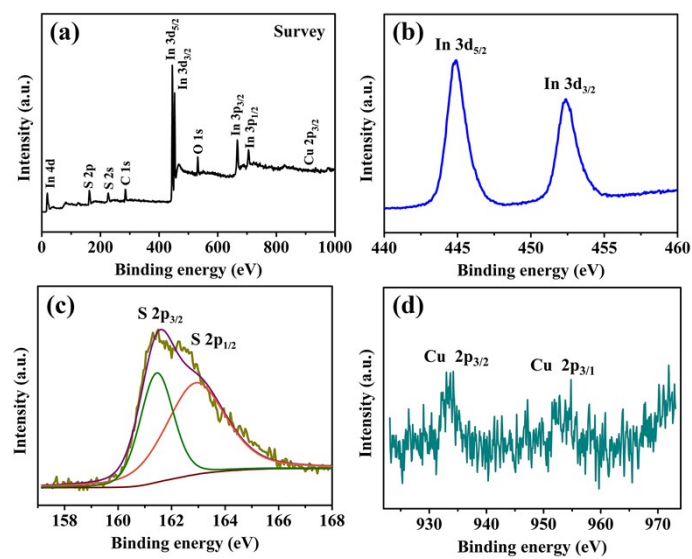

Fig. S5 (a) XPS survey spectrum and high resolution XPS spectra of Cu (2 %) doped  $\text{In}_2\text{S}_3$  QDs corresponding to (b) In 3d, (c) S 2p, (d) Cu 2p regions.

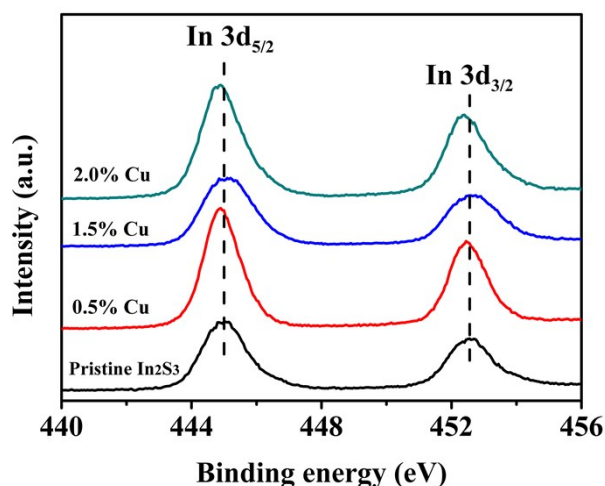

Fig. S6 In 3d core levels measured from the pristine In<sub>2</sub>S<sub>3</sub> and Cu-doped In<sub>2</sub>S<sub>3</sub> QDs. From the XPS survey spectrum of the all sample, the Cu-doped In<sub>2</sub>S<sub>3</sub> spectrum consists of In, S, O and Cu elements except for the C 1s peak, and no impurities and magnetic contamination are detected, indicating the high purity of Cu-doped In<sub>2</sub>S<sub>3</sub> QDs. The O 1s peak recorded on the sample may be due to absorbed O<sub>2</sub>, H<sub>2</sub>O and CO<sub>2</sub> on the surface of the material. The In 3d spectrum (Fig. S2b) shows two peaks at 444.9 eV and 452.7 eV, corresponding to the binding energy of In 3d<sub>5/2</sub> and In 3d<sub>3/2</sub> for In<sup>3+</sup> ions, respectively. In the S 2p spectrum (Fig. S2c), two peaks with binding energies at 161.4 eV and 162.6 eV are assigned to S 2p<sub>3/2</sub> and S 2p<sub>1/2</sub>, respectively, indicating the existing of S<sup>2-</sup> in In<sub>2</sub>S<sub>3</sub>.

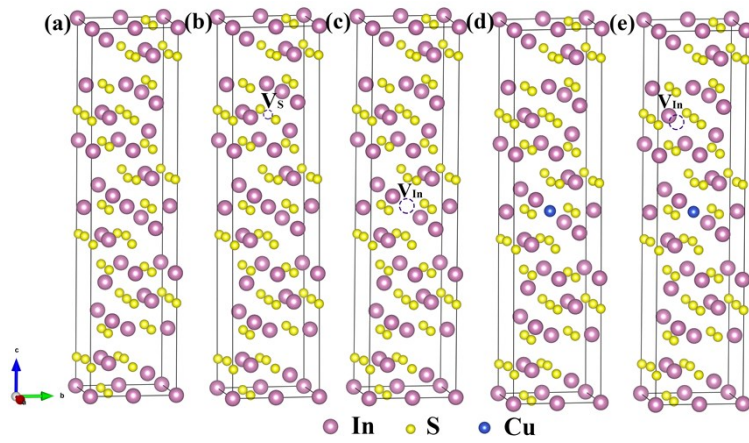

Fig. S7 Five calculation models: (a) the ideal system with no defects or dopants ( $\text{In}_{32}\text{S}_{48}$ ), (b) one S vacancy system ( $V_S$ ), (c) one In vacancy system ( $V_{In}$ ), (d) one Cu atom doped system ( $\text{Cu}_{In}$ ), (e) one In vacancy and one Cu atom doped system ( $\text{Cu}_{In}+V_{In}$ ).
